# Supplementary material for: Relaxin-like Gonad-Stimulating Peptides in Asteroidea
Source: MDPI journal article supplement (doi:10.3390/biom13050781), 2023-04-30
Supplement: s1 [file s1]

Table S1. The Sequence Read Archives (SRAs) used in the analysis of RGP orthologs. RGP homologs were identified by searching the sequence data bases of SRA and identified by BLAST analysis against Trinity (<https://github.com/trinityrnaseq>) assembled contig sequences with the transcriptome sequence data.

| Orders       | Species                                | SRAs        | Accession numbers of RGP and RGPR        |
|--------------|----------------------------------------|-------------|------------------------------------------|
| Valvatida    | <i>Patiria (Asterina) pectinifera</i>  | SRR8627925  | AB496611, LC027938, LC027939<br>LC757025 |
|              |                                        | SRR8627925  | LC567883, LC757026                       |
|              |                                        | SRR8627926  |                                          |
|              | <i>Patiria miniate</i>                 | SRR2454338  | LC057686                                 |
|              | <i>Parvulaster exigua</i>              | SRR10389879 |                                          |
|              | <i>Pateriella regularius</i>           | ERR995409   |                                          |
|              | <i>Asteropsis carnifera</i>            | SRR2843236  |                                          |
|              | <i>Acanthaster cf solaris (planci)</i> | SRR8613694  | LC033566, LOC110989162                   |
|              | <i>Cernardoa semiregularis</i>         | SRR16157127 | LC066682                                 |
|              | <i>Glabraster antarctica</i>           | SRR2844627  |                                          |
| Paxillosida  | <i>Astropecten duplicatus</i>          | SRR28443238 |                                          |
|              | <i>Astropecten latespinosus</i>        | DRR179610   |                                          |
|              | <i>Astropecten scoparius</i>           | SRR12736189 | LC131032                                 |
|              | <i>Luidia quinaria</i>                 | SRR16157128 |                                          |
|              | <i>Luidia clathrate</i>                | SRR1139195  |                                          |
|              | <i>Luidia senegalensis</i>             | SRR3217895  |                                          |
| Forciplatida | <i>Asterias amurensis</i>              | SRR1139201  | LC040882                                 |
|              | <i>Asterias rubens</i>                 | SRR1642063  | KT601728                                 |
|              | <i>Aphelasterias japonica</i>          | SRR16157129 | LC104980                                 |
|              | <i>Marthasterias glacialis</i>         | ERR6436374  |                                          |
|              | <i>Piaster ochraceus</i>               | SRR2846074  |                                          |
|              | <i>Coscinaster acutispina</i>          | —           | LC131033                                 |
|              | <i>Labidiaster annulatus</i>           | SRR2845324  |                                          |
| Velatida     | <i>Pteraster tessellatus</i>           | SRR2846094  |                                          |
| Spinulosida  | <i>Henricia leviuscua</i>              | SRR2844835  |                                          |
|              | <i>Echinaster spinulosus</i>           | SRR1139455  | LC131034                                 |
